# Supplementary material for: A Conceptual Model for Person-centred Oral Health Care Planning in Home Settings: Operationalising the World Health Organisation Global Oral Health Strategy in Home-Based Care
Source: Research Square preprint supplement (doi:10.21203/rs.3.rs-7398439/v1), 2025-10-16
Supplement: Supplementary file 1 [file 05d212c80f8707f6a8671f9b.docx]

| **No.** | **Item** | **SRQR question** | **Response / location in manuscript** |
| --- | --- | --- | --- |
| **S1** | Title | Concise description & identification as qualitative study | Title identifies a **conceptual model** developed through **participatory action research** (qualitative). |
| **S2** | Abstract | Structured summary (background, purpose, methods, results, conclusions) | Abstract contains *Importance, Objective, Design (PAR, mixed methods), Setting, Participants, Outcomes, Results, Conclusions*. |
| **S3** | Problem formulation | Significance, theory & prior work | *Introduction* (1-4) sets oral-health gap in home care, cites WHO strategy & literature (refs 1-16). |
| **S4** | Purpose / research question | Study purpose & objectives | End of *Introduction*: “The aim … is to propose a conceptual model for oral health planning in home care, grounded in person-centred care principles.” |
| **S5** | Qualitative approach & paradigm | Approach, guiding theory, paradigm, rationale | *Study Design* section: **Participatory action research** within an **expansive-learning, constructivist** paradigm; rationale given for iterative co-design. |
| **S6** | Researcher characteristics & reflexivity | Attributes, relationship, assumptions | *Setting & Participants*: authors acted as project managers bridging university, municipal & dental systems; reflexive dialogue throughout iterative analysis. |
| **S7** | Context | Setting/site & contextual factors | Western-Sweden municipal home-care and public-dental systems; decentralised welfare context described (*Setting*, 1-2). |
| **S8** | Sampling strategy | Selection criteria, saturation, rationale | **Purposive sampling** of diverse older adults, relatives & professionals; recruitment until diversity of roles & viewpoints achieved (Setting & Participants). |
| **S9** | Ethical issues | Ethics approval, consent, confidentiality | *Ethical considerations*: Swedish Ethical Review Authority approvals (four Dnr numbers); written consent; adherence to Helsinki. |
| **S10** | Data-collection methods | Types, procedures, timeline, iteration, rationale | Mixed-methods: 60 semi-structured interviews, 24 team assessments, 60 oral-care-card interviews, 217 meeting protocols (Data collection section). Iterative refinements noted. |
| **S11** | Data-collection instruments & technologies | Instruments/devices & changes | Interview guides, standardised oral assessment protocol (ROAG), digital audio recorders; topic guides refined after pilot (Data collection). |
| **S12** | Units of study | Number & characteristics | Older adults, relatives, nurses, nursing assistants, dental hygienists; professional diversity detailed *throughout Data-collection subsections*. |
| **S13** | Data processing | Transcription, management, coding, anonymisation | Interviews transcribed verbatim; NVivo used; meeting notes coded; identifiers removed (Data Analysis). |
| **S14** | Data analysis | Process, researchers, paradigm, rationale | Four-step thematic synthesis (Lewis et al. 2021): identify, synthesise, abstract, model-build; grounded in expansive-learning theory (*Data Analysis*). |
| **S15** | Techniques to enhance trustworthiness | Member-check, audit trail, triangulation | Investigator triangulation (two authors), prolonged engagement (7 y), audit trail of interventions, peer debrief; member verification of themes (Results pre-amble). |
| **S16** | Synthesis & interpretation | Main findings / themes / theory | *Results*: presents seven contextual determinants + three-phase shared-process model (Fig 2) reframing oral-health planning. |
| **S17** | Links to empirical data | Quotes / excerpts supporting findings | Results narrative includes illustrative quotes (e.g., nurse frustration, older-adult preferences) & meeting-log examples. |
| **S18** | Integration with prior work & contribution | Link to literature, implications, transferability | *Discussion* (Integration with Existing Literature, Practical Implications) relates model to person-centred and shared-decision literature; aligns with WHO strategy; notes transferability to decentralised systems. |
| **S19** | Limitations | Trustworthiness & study limits | *Strengths and Limitations* subsection: single-region context, need for adaptation elsewhere, long-term outcomes pending. |
| **S20** | Conflicts of interest | Potential influence, management | *Declaration of interest*: **no conflicts** declared. |
| **S21** | Funding | Sources & funder role | Funding not explicitly stated in excerpt; if none, state “No external funding”; otherwise insert grant details in final manuscript. |
